# Supplementary material for: Roles of Localized Electronic Structures Caused by π Degeneracy Due to Highly Symmetric Heavy Atom‐Free Conjugated Molecular Crystals Leading to Efficient Persistent Room‐Temperature Phosphorescence
Source: PubMed Central journal article supplement (PMC6661950; doi:10.1002/advs.201900410), 2019-05-10
Supplement: ADVS-6-1900410-s001.pdf [file ADVS-6-1900410-s001.pdf]

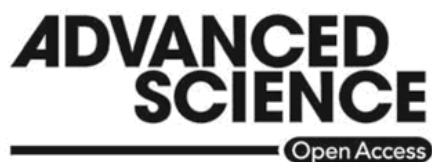

## Supporting Information

for *Adv. Sci.*, DOI: 10.1002/advs.201900410

**Roles of Localized Electronic Structures Caused by  $\pi$  Degeneracy Due to Highly Symmetric Heavy Atom-Free Conjugated Molecular Crystals Leading to Efficient Persistent Room-Temperature Phosphorescence**

*Shuzo Hirata\**

## Supporting Information

**Roles of Localized Electric Structures caused by  $\pi$  Degeneracy due to Highly Symmetric Heavy Atom-free Conjugated Molecular Crystals leading to Efficient Persistent Room-temperature Phosphorescence***Shuzo Hirata*\*

Prof. S. Hirata

Department of Engineering Science, University of Electro-Communications, 1-5-1  
Chofugaoka, Chofu, Tokyo 182-8585, Japan

E-mail: shuzohirata@uec.ac.jp

**Contents**

- 1. Materials**
- 2. Investigation of the rate constant of intersystem crossing from  $S_1$  to  $T_1$  using quantum chemical calculations**
- 3. Analysis of the transfer integrals between two dimers contained in crystalline structure**
- 4. Table S1-S10**
- 5. Figure S1–S11**
- 6. Supporting reference**

## 1. Materials

$C(C_6H_5)_4$ ,  $Si(C_6H_5)_4$ , and  $Ge(C_6H_5)_4$  powders were purchased from Tokyo Chemical Industry Co., Ltd. Single crystals of  $Si(C_6H_5)_4$  and  $Ge(C_6H_5)_4$  were prepared by recrystallization from toluene solutions. The commercially available  $C(C_6H_5)_4$  contained many impurities and did not form crystals well in recrystallization procedures. Therefore, single crystals of  $C(C_6H_5)_4$  were obtained after purification by column chromatography using toluene/hexane and subsequent recrystallization from a toluene/hexane solution.

## 2. Investigation of the rate constant of intersystem crossing from $S_1$ to $T_1$ using quantum chemical calculations

The large  $\Phi_{isc}(RT)$  of  $C(C_6H_5)_4$ ,  $Si(C_6H_5)_4$ , and  $Ge(C_6H_5)_4$  crystals, which were estimated from  $\Phi_{isc}(RT)=1-\Phi_f(RT)$ , were probably not caused by the crystalline-induced enhancement of  $\Phi_{isc}(RT)$ .  $k_{isc}(T)$  is generally expressed as,<sup>[S1]</sup>

$$k_{isc}(T) = \frac{2\pi}{\hbar} \sum_n |\langle \Psi_1^1 | \overline{H_{SO}} | \Psi_n^3 \rangle|^2 \exp \left[ \frac{-(\lambda + \Delta E_{T_n-S_1})^2}{4\lambda kT} \right] / \sqrt{4\lambda kT}, \quad (S1)$$

where  $\overline{H_{SO}}$  is the Hamiltonian operator related to SOC between  $S_1$  and  $T_n$ ,  $\Psi_1^1$  is the wavefunction of  $S_1$ ,  $\Psi_n^3$  is the wavefunction of a high-order triplet excited state ( $T_n$ ),  $\lambda$  is the reorganization energy for the intersystem crossing (ISC) from  $S_1$  to  $T_n$ ,  $\Delta E_{S_1-T_n}$  is the energy difference between  $T_n$  and  $S_1$ , and  $k$  is the Boltzmann constant.  $|\langle \Psi_1^1 | \overline{H_{SO}} | \Psi_n^3 \rangle|^2$  of the monomers and dimer 1–5 for  $C(C_6H_5)_4$ ,  $Si(C_6H_5)_4$ , and  $Ge(C_6H_5)_4$  were separately calculated based on first-order perturbative SOC. Figure S3a–c shows the relationships between  $|\langle \Psi_1^1 | \overline{H_{SO}} | \Psi_n^3 \rangle|^2$  and  $\Delta E_{T_n-S_1}$  for the monomers and dimer 1–5 of the three types of crystals. In equation S1,  $\lambda$  is generally between 0 and 0.5 eV.<sup>[S1]</sup> Therefore, the term  $\exp(-(\lambda + \Delta E_{T_n-S_1})^2 / 4\lambda kT)$  in Equation S1 becomes large when  $\Delta E_{T_n-S_1}$  is from -0.5 to 0 eV and  $|\langle \Psi_1^1 | \overline{H_{SO}} | \Psi_n^3 \rangle|^2$  at  $\Delta E_{T_n-S_1} = -0.5 - 0$  eV mainly contributes to  $k_{isc}(RT)$ . Therefore, investigation

of  $|\langle \Psi_1^1 | \overline{H_{S0}} | \Psi_n^3 \rangle|^2$  at  $\Delta E_{T_n-S_1} = -0.5-0$  eV is important to discuss  $k_{isc}(RT)$  before and after crystallization. For the  $C(C_6H_5)_4$  monomer,  $S_1-T_5$  to  $S_1-T_{14}$  transitions involve ISC at  $\Delta E_{T_n-S_1} = -0.5-0$  eV, as shown in the yellow background of (i) in Figure S3a. The integration of  $|\langle \Psi_1^1 | \overline{H_{S0}} | \Psi_n^3 \rangle|^2$  at  $\Delta E_{T_n-S_1} = -0.5-0$  eV was  $2.85 \text{ cm}^{-2}$  for the  $C(C_6H_5)_4$  monomer. For dimer 1, 2, 3, 4, and 5 of the  $C(C_6H_5)_4$  single crystal, the integrated values of  $|\langle \Psi_1^1 | \overline{H_{S0}} | \Psi_n^3 \rangle|^2$  at  $\Delta E_{T_n-S_1} = -0.5-0$  eV were 2.87, 2.87, 2.75, 2.75, and  $2.68 \text{ cm}^{-2}$ , respectively (yellow background in Figure S3a). Therefore,  $|\langle \Psi_1^1 | \overline{H_{S0}} | \Psi_n^3 \rangle|^2$  at  $\Delta E_{T_n-S_1} = -0.5-0$  eV does not change much among the monomer and dimer 1–5. Small differences of  $|\langle \Psi_1^1 | \overline{H_{S0}} | \Psi_n^3 \rangle|^2$  at  $\Delta E_{T_n-S_1} = -0.5-0$  eV among the monomer and dimer 1–5 were also observed for  $Si(C_6H_5)_4$  and  $Ge(C_6H_5)_4$  (yellow background in Figure S3b and c, respectively). These findings indicate that  $k_{isc}(RT)$  of  $C(C_6H_5)_4$ ,  $Si(C_6H_5)_4$ , and  $Ge(C_6H_5)_4$  are not affected by crystallization.

### 3. Analysis of the transfer integrals between two dimers contained in crystalline structure

It has been reported that a rubrene single crystal shows efficient anisotropic triplet exciton migration at RT of over  $3 \mu\text{m}$  along the  $b$ -axis of the crystalline structure.<sup>[59,67]</sup> Figure S7a(i) and (ii) depict the HOMO and LUMO in a rubrene monomer, respectively. The  $T_1-S_0$  transition of rubrene involves a HOMO–LUMO transition. In a rubrene monomer, both the HOMO and LUMO are delocalized over a tetracene moiety. Because the HOMO and LUMO over the tetracene moiety overlap considerably in the dimer along the  $b$ -axis of a rubrene crystal, the HOMO and LUMO are delocalized over two tetracene moieties in a dimer (Figure S7a, (i) and (ii)). This causes substantial overlap of HOMOs and LUMOs of the two dimers in a tetramer along the  $b$ -axis of a rubrene crystal as well (Figure S7a, (iii)). Therefore, the large transfer integrals of holes and electrons in the two dimers explain the large triplet exciton

migration distance along the *b*-axis of a rubrene crystal. The calculated absolute value of the transfer integrals using the two dimers in a tetramer of rubrene were  $3.6 \times 10^{-2}$  eV for holes and  $2.2 \times 10^{-2}$  eV for electrons. On the other hand, the absolute value of the hole transfer integral calculated using dimer 5 of  $\text{Ge}(\text{C}_6\text{H}_5)_4$  in a tetramer along the *c*-axis of a  $\text{Ge}(\text{C}_6\text{H}_5)_4$  crystal was  $1.7 \times 10^{-3}$  eV. The small hole transfer integral in  $\text{Ge}(\text{C}_6\text{H}_5)_4$  can be explained using a model in which triplet excitons are not delocalized all over dimer 5. Because each HOMO of a  $\text{Ge}(\text{C}_6\text{H}_5)_4$  monomer is localized over two phenylene rings rather than four because of its highly symmetric structure, the HOMO of dimer 5 of  $\text{Ge}(\text{C}_6\text{H}_5)_4$  is also not delocalized over all four phenylene rings (Figure S7b, (i)). Therefore, the localization of the HOMO of each monomer induces the localization of the HOMOs in dimer 5 for the  $\text{Ge}(\text{C}_6\text{H}_5)_4$  structure. Consequently, the HOMOs of the two dimer 5 in a tetramer of  $\text{Ge}(\text{C}_6\text{H}_5)_4$  do not overlap (Figure S7b, (iii)). This explains the small hole transfer integral of  $\text{Ge}(\text{C}_6\text{H}_5)_4$  crystals. Conversely, the symmetric delocalization of the LUMO of each monomer over all phenylene rings causes delocalization of the LUMOs over all phenylene rings of dimer 5 (Figure S7b, (ii)). This leads to a large overlap between the LUMOs of the two dimer 5 in a tetramer along the *c*-axis of a  $\text{Ge}(\text{C}_6\text{H}_5)_4$  crystal (Figure S7b, (iii)). Therefore, the large electron transfer integral of dimer 5 can be explained by a model in which triplet excitons are delocalized over two dimers. Indeed, the absolute value of the electron transfer integral calculated using dimer 5 of  $\text{Ge}(\text{C}_6\text{H}_5)_4$  in a tetramer along the *c*-axis of a  $\text{Ge}(\text{C}_6\text{H}_5)_4$  crystal was  $2.4 \times 10^{-2}$  eV, which is comparable to that of rubrene. Similar overall characteristics were also observed in pairs of other dimers of  $\text{Ge}(\text{C}_6\text{H}_5)_4$  crystals and for the other two types of crystals. Therefore, the localization of HOMOs caused by the highly symmetric structures in  $\text{C}(\text{C}_6\text{H}_5)_4$ ,  $\text{Si}(\text{C}_6\text{H}_5)_4$ , and  $\text{Ge}(\text{C}_6\text{H}_5)_4$  triggers inefficient hole transfer, which contributes to the suppressed triplet exciton diffusion and leads to the minimization of  $k_q(\text{RT})$ .

## 4. Table S1-S10

**Table S1.** Calculated photophysical parameters of isolated  $C(C_6H_5)_4$ ,  $Si(C_6H_5)_4$ , and  $Ge(C_6H_5)_4$ . Conformations were optimized using DFT (Gaussian09/B3LYP/sdd) calculations.  $S_1$  and  $T_1$  energies and the oscillator strength for the  $S_0-S_1$  transition ( $f$ ) were determined by TD-DFT (Gaussian09/B3LYP/sdd) calculations.

| Compound       | $S_1$  |        | $T_1$  |        | $f$    |
|----------------|--------|--------|--------|--------|--------|
|                | [eV]   | [nm]   | [eV]   | [nm]   |        |
| $C(C_6H_5)_4$  | 4.9793 | 249.03 | 3.5129 | 353.98 | 0.1490 |
| $Si(C_6H_5)_4$ | 5.1952 | 238.68 | 3.6481 | 339.90 | 0.0029 |
| $Ge(C_6H_5)_4$ | 5.2400 | 236.64 | 3.6632 | 338.50 | 0.0041 |

**Table S2.** Calculated photophysical parameters of  $C(C_6H_5)_4$ ,  $Si(C_6H_5)_4$ , and  $Ge(C_6H_5)_4$  in the crystalline state. Monomer configurations determined by single-crystal X-ray analyses were used to determine the  $S_1$  and  $T_1$  energies and oscillator strength ( $f$ ) for the  $S_0-S_1$  transition by TD-DFT (Gaussian09/B3LYP/sdd) calculations.

| Crystal        | $S_1$  |        | $T_1$  |        | $f$    |
|----------------|--------|--------|--------|--------|--------|
|                | [eV]   | [nm]   | [eV]   | [nm]   |        |
| $C(C_6H_5)_4$  | 5.1386 | 241.31 | 3.8731 | 320.16 | 0.0136 |
| $Si(C_6H_5)_4$ | 5.3742 | 230.73 | 3.9594 | 313.18 | 0.0006 |
| $Ge(C_6H_5)_4$ | 5.4089 | 229.25 | 3.9639 | 312.82 | 0.0005 |

**Table S3.**  $k_{pn}$  and  $\Delta E_{T1-T_n}$  values of  $C(C_6H_5)_4$ ,  $Si(C_6H_5)_4$ , and  $Ge(C_6H_5)_4$  crystals.

| <i>i</i> | $C(C_6H_5)_4$            |                             |            | $Si(C_6H_5)_4$           |                             |            | $Ge(C_6H_5)_4$           |                             |            |
|----------|--------------------------|-----------------------------|------------|--------------------------|-----------------------------|------------|--------------------------|-----------------------------|------------|
|          | $k_{pn}$<br>( $s^{-1}$ ) | $\Delta E_{T1-T_i}$<br>(eV) | Dimer type | $k_{pi}$<br>( $s^{-1}$ ) | $\Delta E_{T1-T_i}$<br>(eV) | Dimer type | $k_{pi}$<br>( $s^{-1}$ ) | $\Delta E_{T1-T_i}$<br>(eV) | Dimer type |
| 1        | 0.0359                   | 0.0000                      | Dimer 1    | 0.0333                   | 0.0000                      | Dimer 5    | 0.3280                   | 0.0000                      | Dimer 5    |
| 2        | 0.0361                   | 0.0000                      | Dimer 2    | 0.0713                   | 0.0016                      | Dimer 1    | 0.6270                   | 0.0035                      | Dimer 1    |
| 3        | 0.0613                   | 0.0025                      | Dimer 1    | 0.0728                   | 0.0016                      | Dimer 2    | 0.6543                   | 0.0035                      | Dimer 2    |
| 4        | 0.0614                   | 0.0025                      | Dimer 2    | 0.0254                   | 0.0033                      | Dimer 5    | 0.5160                   | 0.0046                      | Dimer 1    |
| 5        | 0.0740                   | 0.0040                      | Dimer 5    | 0.0233                   | 0.0033                      | Dimer 5    | 0.5162                   | 0.0046                      | Dimer 2    |
| 6        | 0.0216                   | 0.0040                      | Dimer 5    | 0.0487                   | 0.0039                      | Dimer 1    | 0.0061                   | 0.0058                      | Dimer 3    |
| 7        | 0.1280                   | 0.0043                      | Dimer 3    | 0.0475                   | 0.0039                      | Dimer 2    | 0.0330                   | 0.0058                      | Dimer 4    |
| 8        | 0.1282                   | 0.0043                      | Dimer 4    | 0.0186                   | 0.0059                      | Dimer 3    | 0.8660                   | 0.0061                      | Dimer 3    |
| 9        | 0.0014                   | 0.0043                      | Dimer 3    | 0.0165                   | 0.0059                      | Dimer 4    | 0.8344                   | 0.0061                      | Dimer 4    |
| 10       | 0.0013                   | 0.0043                      | Dimer 4    | 0.1180                   | 0.0067                      | Dimer 3    | 0.4410                   | 0.0061                      | Dimer 5    |
| 11       | 0.0807                   | 0.0045                      | Dimer 3    | 0.1266                   | 0.0067                      | Dimer 4    | 0.1820                   | 0.0139                      | Dimer 1    |
| 12       | 0.0811                   | 0.0045                      | Dimer 4    | 0.0295                   | 0.0070                      | Dimer 1    | 0.1858                   | 0.0139                      | Dimer 2    |
| 13       | 0.0614                   | 0.0047                      | Dimer 1    | 0.0296                   | 0.0070                      | Dimer 2    | 0.0449                   | 0.0141                      | Dimer 5    |
| 14       | 0.0616                   | 0.0047                      | Dimer 2    | 0.0452                   | 0.0074                      | Dimer 1    | 0.0467                   | 0.0141                      | Dimer 5    |
| 15       | 0.0341                   | 0.0050                      | Dimer 1    | 0.0463                   | 0.0074                      | Dimer 2    | 0.2030                   | 0.0172                      | Dimer 1    |
| 16       | 0.0342                   | 0.0050                      | Dimer 2    | 0.0272                   | 0.0074                      | Dimer 3    | 0.1925                   | 0.0172                      | Dimer 2    |
| 17       | 0.0543                   | 0.0052                      | Dimer 5    | 0.0240                   | 0.0074                      | Dimer 4    | 0.1670                   | 0.0178                      | Dimer 3    |
| 18       | 0.0091                   | 0.0052                      | Dimer 5    | 0.0192                   | 0.0075                      | Dimer 3    | 0.1634                   | 0.0178                      | Dimer 4    |
| 19       | 0.0004                   | 0.0052                      | Dimer 3    | 0.0243                   | 0.0075                      | Dimer 4    | 0.1170                   | 0.0183                      | Dimer 1    |
| 20       | 0.0004                   | 0.0052                      | Dimer 4    | 0.0234                   | 0.0076                      | Dimer 3    | 0.1140                   | 0.0183                      | Dimer 2    |
| 21       | 0.0367                   | 0.0468                      | Dimer 1    | 0.0288                   | 0.0076                      | Dimer 4    | 0.0048                   | 0.0183                      | Dimer 3    |
| 22       | 0.0368                   | 0.0468                      | Dimer 2    | 0.0447                   | 0.0076                      | Dimer 1    | 0.0094                   | 0.0183                      | Dimer 4    |
| 23       | 0.0272                   | 0.0473                      | Dimer 1    | 0.0444                   | 0.0076                      | Dimer 2    | 0.0231                   | 0.0185                      | Dimer 3    |
| 24       | 0.0273                   | 0.0473                      | Dimer 2    | 0.0126                   | 0.0076                      | Dimer 3    | 0.0159                   | 0.0185                      | Dimer 4    |
| 25       | 0.0041                   | 0.0475                      | Dimer 5    | 0.0120                   | 0.0076                      | Dimer 4    | 0.0112                   | 0.0185                      | Dimer 3    |
| 26       | 0.0001                   | 0.0483                      | Dimer 3    | 0.0200                   | 0.0077                      | Dimer 1    | 0.0179                   | 0.0185                      | Dimer 4    |
| 27       | 0.0000                   | 0.0483                      | Dimer 4    | 0.0195                   | 0.0077                      | Dimer 2    | 0.0628                   | 0.0186                      | Dimer 1    |
| 28       | 0.0355                   | 0.0484                      | Dimer 5    | 0.0532                   | 0.0082                      | Dimer 5    | 0.0627                   | 0.0186                      | Dimer 2    |
| 29       | 0.0691                   | 0.0486                      | Dimer 3    | 0.0117                   | 0.0082                      | Dimer 5    | 0.0518                   | 0.0190                      | Dimer 5    |
| 30       | 0.0692                   | 0.0486                      | Dimer 4    | 0.0109                   | 0.0082                      | Dimer 5    | 0.0518                   | 0.0190                      | Dimer 5    |
| 31       | 0.0556                   | 0.0653                      | Dimer 1    | 0.1900                   | 0.0180                      | Dimer 5    | 1.4300                   | 0.0210                      | Dimer 5    |
| 32       | 0.0558                   | 0.0653                      | Dimer 2    | 0.2370                   | 0.0193                      | Dimer 1    | 1.3100                   | 0.0231                      | Dimer 1    |
| 33       | 0.0833                   | 0.0653                      | Dimer 1    | 0.2440                   | 0.0193                      | Dimer 2    | 1.3198                   | 0.0231                      | Dimer 2    |
| 34       | 0.0835                   | 0.0653                      | Dimer 2    | 0.0068                   | 0.0207                      | Dimer 3    | 0.0161                   | 0.0241                      | Dimer 3    |
| 35       | 0.0941                   | 0.0662                      | Dimer 5    | 0.0031                   | 0.0207                      | Dimer 4    | 0.0868                   | 0.0241                      | Dimer 4    |
| 36       | 0.0111                   | 0.0672                      | Dimer 5    | 0.1350                   | 0.0209                      | Dimer 1    | 2.3300                   | 0.0241                      | Dimer 3    |
| 37       | 0.0001                   | 0.0673                      | Dimer 3    | 0.1271                   | 0.0209                      | Dimer 2    | 2.2552                   | 0.0241                      | Dimer 4    |
| 38       | 0.0001                   | 0.0673                      | Dimer 4    | 0.4170                   | 0.0210                      | Dimer 3    | 1.5100                   | 0.0242                      | Dimer 1    |
| 39       | 0.0001                   | 0.0676                      | Dimer 3    | 0.4471                   | 0.0210                      | Dimer 4    | 1.4914                   | 0.0242                      | Dimer 2    |
| 40       | 0.1509                   | 0.0676                      | Dimer 4    | 0.1760                   | 0.0214                      | Dimer 5    | 1.2300                   | 0.0242                      | Dimer 5    |

**Table S4.** Summary of  $|H_h|$  and  $|H_e|$  of dimer 1–5 of  $C(C_6H_5)_4$ ,  $Si(C_6H_5)_4$ , and  $Ge(C_6H_5)_4$  crystals.

|               |                                  | Dimer 1               | Dimer 2               | Dimer 3                | Dimer 4                | Dimer 5               |
|---------------|----------------------------------|-----------------------|-----------------------|------------------------|------------------------|-----------------------|
| $C(C_6H_5)_4$ | $ H_h $ (eV)                     | $4.56 \times 10^{-3}$ | $6.51 \times 10^{-3}$ | $2.22 \times 10^{-3}$  | $1.09 \times 10^{-3}$  | $1.87 \times 10^{-3}$ |
|               | $ H_e $ (eV)                     | $1.58 \times 10^{-2}$ | $1.58 \times 10^{-2}$ | $1.25 \times 10^{-2}$  | $1.25 \times 10^{-2}$  | $3.19 \times 10^{-2}$ |
|               | $H_h^2$ (eV <sup>2</sup> )       | $2.08 \times 10^{-5}$ | $4.24 \times 10^{-5}$ | $4.93 \times 10^{-6}$  | $1.19 \times 10^{-6}$  | $3.50 \times 10^{-6}$ |
|               | $H_e^2$ (eV <sup>2</sup> )       | $2.49 \times 10^{-4}$ | $2.49 \times 10^{-4}$ | $1.56 \times 10^{-4}$  | $1.56 \times 10^{-4}$  | $1.02 \times 10^{-3}$ |
|               | $H_h^2 H_e^2$ (eV <sup>4</sup> ) | $5.18 \times 10^{-9}$ | $1.06 \times 10^{-8}$ | $7.68 \times 10^{-10}$ | $1.85 \times 10^{-10}$ | $3.56 \times 10^{-9}$ |

|                |                                  | Dimer 1                | Dimer 2               | Dimer 3                | Dimer 4                | Dimer 5               |
|----------------|----------------------------------|------------------------|-----------------------|------------------------|------------------------|-----------------------|
| $Si(C_6H_5)_4$ | $ H_h $ (eV)                     | $3.73 \times 10^{-3}$  | $7.02 \times 10^{-3}$ | $9.40 \times 10^{-4}$  | $4.40 \times 10^{-4}$  | $8.17 \times 10^{-3}$ |
|                | $ H_e $ (eV)                     | $8.45 \times 10^{-3}$  | $8.45 \times 10^{-3}$ | $3.01 \times 10^{-3}$  | $3.01 \times 10^{-3}$  | $5.03 \times 10^{-2}$ |
|                | $H_h^2$ (eV <sup>2</sup> )       | $1.39 \times 10^{-5}$  | $4.93 \times 10^{-5}$ | $8.84 \times 10^{-7}$  | $1.94 \times 10^{-7}$  | $6.67 \times 10^{-5}$ |
|                | $H_e^2$ (eV <sup>2</sup> )       | $7.14 \times 10^{-5}$  | $7.14 \times 10^{-5}$ | $9.06 \times 10^{-6}$  | $9.06 \times 10^{-6}$  | $2.53 \times 10^{-3}$ |
|                | $H_h^2 H_e^2$ (eV <sup>4</sup> ) | $9.93 \times 10^{-10}$ | $3.52 \times 10^{-9}$ | $8.01 \times 10^{-12}$ | $1.75 \times 10^{-12}$ | $1.69 \times 10^{-7}$ |

|                |                                  | Dimer 1                | Dimer 2               | Dimer 3                | Dimer 4                | Dimer 5               |
|----------------|----------------------------------|------------------------|-----------------------|------------------------|------------------------|-----------------------|
| $Ge(C_6H_5)_4$ | $ H_h $ (eV)                     | $3.01 \times 10^{-3}$  | $1.45 \times 10^{-2}$ | $4.60 \times 10^{-4}$  | $1.91 \times 10^{-3}$  | $7.32 \times 10^{-3}$ |
|                | $ H_e $ (eV)                     | $7.26 \times 10^{-3}$  | $7.26 \times 10^{-3}$ | $1.97 \times 10^{-3}$  | $1.97 \times 10^{-3}$  | $3.75 \times 10^{-2}$ |
|                | $H_h^2$ (eV <sup>2</sup> )       | $9.06 \times 10^{-6}$  | $2.10 \times 10^{-4}$ | $2.12 \times 10^{-7}$  | $3.65 \times 10^{-6}$  | $5.36 \times 10^{-5}$ |
|                | $H_e^2$ (eV <sup>2</sup> )       | $5.27 \times 10^{-5}$  | $5.27 \times 10^{-5}$ | $3.88 \times 10^{-6}$  | $3.88 \times 10^{-6}$  | $1.41 \times 10^{-3}$ |
|                | $H_h^2 H_e^2$ (eV <sup>4</sup> ) | $4.78 \times 10^{-10}$ | $1.11 \times 10^{-8}$ | $8.21 \times 10^{-13}$ | $1.42 \times 10^{-11}$ | $7.53 \times 10^{-8}$ |



**Table S5.** Spin-orbit matrix elements ( $|\langle \Psi_m^1 | \overline{H_{SO}} | \Psi_n^3 \rangle|^2$  ( $\text{cm}^{-2}$ )) for dimer 2 in (a)  $\text{C}(\text{C}_6\text{H}_5)_4$ , (b)  $\text{Si}(\text{C}_6\text{H}_5)_4$ , and (c)  $\text{Ge}(\text{C}_6\text{H}_5)_4$ . Red values in (b) are  $|\langle \Psi_m^1 | \overline{H_{SO}} | \Psi_n^3 \rangle|^2 > 1.7 \text{ cm}^{-2}$ . Red values in (c) are  $|\langle \Psi_m^1 | \overline{H_{SO}} | \Psi_n^3 \rangle|^2 > 5.1 \text{ cm}^{-2}$ .

(a)

| $n \backslash m$ | 1     | 2     | 3     | 4     | 5     | 6     | 7     | 8     | 9     | 10    |
|------------------|-------|-------|-------|-------|-------|-------|-------|-------|-------|-------|
| 1                | 0.031 | 0.027 | 0.018 | 0.275 | 0.051 | 0.381 | 0.000 | 0.028 | 0.020 | 0.012 |
| 2                | 0.001 | 0.066 | 0.011 | 0.301 | 0.014 | 0.090 | 0.006 | 0.067 | 0.091 | 0.005 |
| 3                | 0.477 | 0.136 | 0.001 | 0.052 | 0.079 | 0.128 | 0.074 | 0.123 | 0.071 | 0.005 |
| 4                | 0.151 | 0.452 | 0.000 | 0.057 | 0.012 | 0.453 | 0.001 | 0.003 | 0.061 | 0.057 |
| 5                | 0.447 | 0.193 | 0.023 | 0.116 | 0.009 | 0.003 | 0.000 | 0.078 | 0.021 | 0.007 |
| 6                | 0.082 | 0.385 | 0.003 | 0.322 | 0.010 | 0.001 | 0.000 | 0.023 | 0.083 | 0.018 |
| 7                | 0.087 | 0.844 | 0.020 | 0.444 | 0.003 | 0.017 | 0.003 | 0.037 | 0.132 | 0.022 |
| 8                | 0.906 | 0.102 | 0.094 | 0.611 | 0.011 | 0.085 | 0.000 | 0.058 | 0.020 | 0.045 |

(b)

| $n \backslash m$ | 1     | 2     | 3     | 4     | 5     | 6     | 7     | 8     | 9            | 10           |
|------------------|-------|-------|-------|-------|-------|-------|-------|-------|--------------|--------------|
| 1                | 0.074 | 0.158 | 0.001 | 0.055 | 0.064 | 0.194 | 0.001 | 0.037 | 0.317        | 0.433        |
| 2                | 0.030 | 0.056 | 0.001 | 0.001 | 0.098 | 0.062 | 0.001 | 0.018 | 0.238        | 0.298        |
| 3                | 0.073 | 0.032 | 0.000 | 0.140 | 0.008 | 0.117 | 0.000 | 0.038 | 0.252        | 0.102        |
| 4                | 0.028 | 0.089 | 0.001 | 0.019 | 0.155 | 0.152 | 0.000 | 0.006 | 0.023        | 0.236        |
| 5                | 0.048 | 0.040 | 0.003 | 0.020 | 0.227 | 0.021 | 0.001 | 0.004 | 0.132        | 0.400        |
| 6                | 0.100 | 0.008 | 0.000 | 0.041 | 0.155 | 0.183 | 0.001 | 0.072 | 0.337        | 0.031        |
| 7                | 0.081 | 0.329 | 0.007 | 0.229 | 0.022 | 0.079 | 0.000 | 0.011 | 0.212        | <b>1.800</b> |
| 8                | 0.318 | 0.123 | 0.004 | 0.241 | 0.063 | 0.011 | 0.000 | 0.020 | <b>2.160</b> | 0.351        |

(c)

| $n \backslash m$ | 1     | 2     | 3     | 4     | 5     | 6     | 7     | 8     | 9            | 10           |
|------------------|-------|-------|-------|-------|-------|-------|-------|-------|--------------|--------------|
| 1                | 0.464 | 0.038 | 0.000 | 0.205 | 0.013 | 0.030 | 0.030 | 0.076 | <b>5.370</b> | 1.860        |
| 2                | 0.014 | 0.271 | 0.016 | 0.091 | 0.000 | 0.009 | 0.012 | 0.769 | 2.460        | 2.650        |
| 3                | 0.363 | 0.052 | 0.039 | 0.117 | 0.037 | 0.224 | 0.006 | 0.074 | 0.867        | 0.879        |
| 4                | 0.133 | 0.398 | 0.001 | 0.041 | 0.088 | 0.172 | 0.001 | 0.042 | 0.160        | 1.330        |
| 5                | 0.184 | 0.204 | 0.001 | 0.006 | 0.192 | 0.008 | 0.000 | 0.032 | 0.443        | 0.627        |
| 6                | 0.014 | 0.032 | 0.004 | 0.425 | 0.123 | 0.060 | 0.001 | 0.098 | 0.504        | 0.124        |
| 7                | 0.670 | 0.311 | 0.044 | 0.509 | 0.090 | 0.508 | 0.000 | 0.015 | <b>5.880</b> | <b>6.630</b> |
| 8                | 0.180 | 0.943 | 0.039 | 0.620 | 0.392 | 0.083 | 0.000 | 0.005 | <b>6.530</b> | <b>7.510</b> |

**Table S6.** Spin-orbit matrix elements ( $|\langle \psi_m^1 | \overline{H_{SO}} | \psi_i^3 \rangle|^2$  (cm<sup>-2</sup>)) for dimer 1–5 of C(C<sub>6</sub>H<sub>5</sub>)<sub>4</sub>.

The relationship between triplet energy and  $i$  is shown in Table S3.

| $i \backslash m$ | 1     | 2     | 3     | 4     | 5     | 6     | 7     | 8     | 9     | 10    | Number of dimer |
|------------------|-------|-------|-------|-------|-------|-------|-------|-------|-------|-------|-----------------|
| 1                | 0.106 | 0.463 | 0.044 | 0.263 | 0.498 | 0.639 | 0.045 | 0.304 | 1.180 | 0.194 | Dimer 1         |
| 2                | 0.031 | 0.027 | 0.018 | 0.275 | 0.051 | 0.381 | 0.000 | 0.028 | 0.020 | 0.012 | Dimer 2         |
| 3                | 0.001 | 0.066 | 0.011 | 0.301 | 0.014 | 0.090 | 0.007 | 0.065 | 0.091 | 0.004 | Dimer 1         |
| 4                | 0.001 | 0.066 | 0.011 | 0.301 | 0.014 | 0.090 | 0.006 | 0.067 | 0.091 | 0.005 | Dimer 2         |
| 5                | 0.002 | 0.196 | 0.000 | 0.542 | 0.042 | 0.002 | 0.046 | 0.372 | 0.034 | 0.015 | Dimer 5         |
| 6                | 0.196 | 0.002 | 0.006 | 0.000 | 0.002 | 0.042 | 0.045 | 0.375 | 0.014 | 0.033 | Dimer 5         |
| 7                | 0.066 | 0.001 | 0.012 | 0.006 | 0.005 | 0.603 | 0.006 | 0.002 | 0.139 | 0.004 | Dimer 3         |
| 8                | 0.066 | 0.000 | 0.013 | 0.000 | 0.000 | 0.602 | 0.006 | 0.002 | 0.141 | 0.004 | Dimer 4         |
| 9                | 0.001 | 0.020 | 0.000 | 0.645 | 0.612 | 0.005 | 0.000 | 0.081 | 0.001 | 0.149 | Dimer 3         |
| 10               | 0.000 | 0.021 | 0.000 | 0.650 | 0.618 | 0.000 | 0.000 | 0.079 | 0.000 | 0.153 | Dimer 4         |
| 11               | 0.625 | 0.000 | 0.003 | 0.000 | 0.000 | 0.617 | 0.021 | 0.001 | 0.083 | 0.007 | Dimer 3         |
| 12               | 0.624 | 0.000 | 0.003 | 0.000 | 0.000 | 0.614 | 0.022 | 0.000 | 0.086 | 0.006 | Dimer 4         |
| 13               | 0.477 | 0.136 | 0.001 | 0.052 | 0.079 | 0.127 | 0.074 | 0.121 | 0.070 | 0.006 | Dimer 1         |
| 14               | 0.477 | 0.136 | 0.001 | 0.052 | 0.079 | 0.128 | 0.074 | 0.123 | 0.071 | 0.005 | Dimer 2         |
| 15               | 0.151 | 0.452 | 0.000 | 0.057 | 0.013 | 0.452 | 0.001 | 0.003 | 0.062 | 0.056 | Dimer 1         |
| 16               | 0.151 | 0.452 | 0.000 | 0.057 | 0.012 | 0.453 | 0.001 | 0.003 | 0.061 | 0.057 | Dimer 2         |
| 17               | 0.000 | 0.467 | 0.000 | 0.202 | 0.000 | 0.000 | 0.035 | 0.254 | 0.042 | 0.095 | Dimer 5         |
| 18               | 0.466 | 0.000 | 0.000 | 0.000 | 0.000 | 0.000 | 0.036 | 0.254 | 0.094 | 0.041 | Dimer 5         |
| 19               | 0.000 | 0.672 | 0.000 | 0.023 | 0.623 | 0.000 | 0.000 | 0.140 | 0.005 | 0.080 | Dimer 3         |
| 20               | 0.000 | 0.672 | 0.000 | 0.023 | 0.624 | 0.000 | 0.000 | 0.144 | 0.004 | 0.077 | Dimer 4         |
| 21               | 0.447 | 0.193 | 0.023 | 0.117 | 0.009 | 0.003 | 0.000 | 0.079 | 0.019 | 0.008 | Dimer 1         |
| 22               | 0.447 | 0.193 | 0.023 | 0.116 | 0.009 | 0.003 | 0.000 | 0.078 | 0.021 | 0.007 | Dimer 2         |
| 23               | 0.082 | 0.385 | 0.003 | 0.322 | 0.010 | 0.001 | 0.000 | 0.023 | 0.081 | 0.018 | Dimer 1         |
| 24               | 0.082 | 0.385 | 0.003 | 0.322 | 0.010 | 0.001 | 0.000 | 0.023 | 0.083 | 0.018 | Dimer 2         |
| 25               | 0.476 | 0.491 | 0.000 | 0.007 | 0.004 | 0.004 | 0.000 | 0.000 | 0.063 | 0.068 | Dimer 5         |
| 26               | 0.000 | 0.498 | 0.000 | 0.494 | 0.000 | 0.000 | 0.000 | 0.116 | 0.000 | 0.125 | Dimer 3         |
| 27               | 0.000 | 0.498 | 0.000 | 0.495 | 0.000 | 0.000 | 0.000 | 0.116 | 0.000 | 0.125 | Dimer 4         |
| 28               | 0.041 | 0.029 | 0.053 | 0.448 | 0.003 | 0.003 | 0.000 | 0.001 | 0.038 | 0.035 | Dimer 5         |
| 29               | 0.514 | 0.000 | 0.090 | 0.000 | 0.000 | 0.000 | 0.000 | 0.001 | 0.118 | 0.000 | Dimer 3         |
| 30               | 0.514 | 0.000 | 0.089 | 0.000 | 0.000 | 0.000 | 0.000 | 0.000 | 0.118 | 0.000 | Dimer 4         |
| 31               | 0.086 | 0.844 | 0.020 | 0.444 | 0.003 | 0.017 | 0.003 | 0.037 | 0.128 | 0.023 | Dimer 1         |
| 32               | 0.087 | 0.844 | 0.020 | 0.444 | 0.003 | 0.017 | 0.003 | 0.037 | 0.132 | 0.022 | Dimer 2         |
| 33               | 0.906 | 0.102 | 0.094 | 0.611 | 0.011 | 0.086 | 0.000 | 0.056 | 0.019 | 0.044 | Dimer 1         |
| 34               | 0.906 | 0.102 | 0.094 | 0.611 | 0.011 | 0.085 | 0.000 | 0.058 | 0.020 | 0.045 | Dimer 2         |
| 35               | 0.023 | 0.021 | 0.001 | 1.000 | 0.000 | 0.000 | 0.012 | 0.000 | 0.075 | 0.072 | Dimer 5         |
| 36               | 0.023 | 0.021 | 0.001 | 1.000 | 0.000 | 0.000 | 0.012 | 0.000 | 0.075 | 0.072 | Dimer 5         |
| 37               | 0.000 | 1.050 | 0.000 | 1.010 | 0.098 | 0.000 | 0.000 | 0.130 | 0.000 | 0.155 | Dimer 3         |
| 38               | 0.000 | 1.050 | 0.000 | 1.010 | 0.098 | 0.000 | 0.000 | 0.132 | 0.000 | 0.151 | Dimer 4         |
| 39               | 1.040 | 0.000 | 0.005 | 0.000 | 0.000 | 0.094 | 0.001 | 0.001 | 0.147 | 0.000 | Dimer 3         |
| 40               | 1.040 | 0.000 | 0.005 | 0.000 | 0.000 | 0.094 | 0.000 | 0.001 | 0.152 | 0.000 | Dimer 4         |

**Table S7.** Spin-orbit matrix elements ( $|\langle \Psi_m^1 | \overline{H_{SO}} | \Psi_i^3 \rangle|^2$  ( $\text{cm}^{-2}$ )) for dimer 1–5 of  $\text{Si}(\text{C}_6\text{H}_5)_4$ .

The relationship between triplet energy and  $i$  is shown in Table S3. Red values are  $|\langle \Psi_m^1 | \overline{H_{SO}} | \Psi_n^3 \rangle|^2 > 1.7 \text{ cm}^{-2}$ .

| $i \backslash m$ | 1     | 2     | 3     | 4     | 5     | 6     | 7     | 8     | 9     | 10    | Number of dimer |
|------------------|-------|-------|-------|-------|-------|-------|-------|-------|-------|-------|-----------------|
| 1                | 0.074 | 0.158 | 0.001 | 0.055 | 0.064 | 0.194 | 0.001 | 0.038 | 0.347 | 0.413 | Dimer 5         |
| 2                | 0.181 | 0.180 | 0.000 | 0.047 | 0.047 | 0.006 | 0.010 | 0.523 | 0.059 | 0.057 | Dimer 1         |
| 3                | 0.074 | 0.158 | 0.001 | 0.055 | 0.064 | 0.194 | 0.001 | 0.037 | 0.317 | 0.433 | Dimer 2         |
| 4                | 0.031 | 0.056 | 0.001 | 0.001 | 0.098 | 0.062 | 0.001 | 0.018 | 0.226 | 0.314 | Dimer 5         |
| 5                | 0.073 | 0.032 | 0.000 | 0.139 | 0.008 | 0.117 | 0.000 | 0.038 | 0.257 | 0.092 | Dimer 5         |
| 6                | 0.023 | 0.022 | 0.009 | 0.004 | 0.068 | 0.122 | 0.000 | 0.000 | 0.365 | 0.012 | Dimer 1         |
| 7                | 0.030 | 0.056 | 0.001 | 0.001 | 0.098 | 0.062 | 0.001 | 0.018 | 0.238 | 0.298 | Dimer 2         |
| 8                | 0.095 | 0.033 | 0.000 | 0.122 | 0.000 | 0.131 | 0.000 | 0.002 | 0.376 | 0.079 | Dimer 3         |
| 9                | 0.095 | 0.033 | 0.000 | 0.122 | 0.000 | 0.131 | 0.000 | 0.003 | 0.380 | 0.063 | Dimer 4         |
| 10               | 0.008 | 0.162 | 0.007 | 0.000 | 0.036 | 0.000 | 0.000 | 0.014 | 0.038 | 0.696 | Dimer 3         |
| 11               | 0.008 | 0.162 | 0.007 | 0.000 | 0.036 | 0.000 | 0.000 | 0.015 | 0.032 | 0.700 | Dimer 4         |
| 12               | 0.022 | 0.023 | 0.009 | 0.068 | 0.004 | 0.121 | 0.000 | 0.046 | 0.012 | 0.366 | Dimer 1         |
| 13               | 0.073 | 0.032 | 0.000 | 0.140 | 0.008 | 0.117 | 0.000 | 0.038 | 0.252 | 0.102 | Dimer 2         |
| 14               | 0.058 | 0.058 | 0.000 | 0.120 | 0.120 | 0.000 | 0.040 | 0.364 | 0.304 | 0.302 | Dimer 1         |
| 15               | 0.028 | 0.089 | 0.001 | 0.019 | 0.155 | 0.152 | 0.000 | 0.006 | 0.023 | 0.236 | Dimer 2         |
| 16               | 0.082 | 0.070 | 0.000 | 0.058 | 0.000 | 0.253 | 0.001 | 0.001 | 0.356 | 0.166 | Dimer 3         |
| 17               | 0.082 | 0.071 | 0.000 | 0.058 | 0.000 | 0.253 | 0.001 | 0.000 | 0.352 | 0.134 | Dimer 4         |
| 18               | 0.030 | 0.001 | 0.000 | 0.064 | 0.389 | 0.008 | 0.000 | 0.089 | 0.029 | 0.029 | Dimer 3         |
| 19               | 0.032 | 0.002 | 0.000 | 0.063 | 0.391 | 0.005 | 0.000 | 0.089 | 0.034 | 0.025 | Dimer 4         |
| 20               | 0.001 | 0.007 | 0.006 | 0.002 | 0.008 | 0.390 | 0.000 | 0.001 | 0.009 | 0.181 | Dimer 3         |
| 21               | 0.001 | 0.007 | 0.006 | 0.001 | 0.005 | 0.393 | 0.000 | 0.001 | 0.007 | 0.235 | Dimer 4         |
| 22               | 0.061 | 0.001 | 0.000 | 0.058 | 0.000 | 0.169 | 0.000 | 0.222 | 0.003 | 0.046 | Dimer 1         |
| 23               | 0.048 | 0.040 | 0.003 | 0.020 | 0.227 | 0.021 | 0.001 | 0.004 | 0.132 | 0.400 | Dimer 2         |
| 24               | 0.072 | 0.023 | 0.001 | 0.028 | 0.354 | 0.000 | 0.000 | 0.068 | 0.369 | 0.074 | Dimer 3         |
| 25               | 0.070 | 0.023 | 0.001 | 0.030 | 0.355 | 0.000 | 0.000 | 0.064 | 0.367 | 0.076 | Dimer 4         |
| 26               | 0.001 | 0.061 | 0.000 | 0.000 | 0.058 | 0.170 | 0.001 | 0.022 | 0.046 | 0.003 | Dimer 1         |
| 27               | 0.100 | 0.008 | 0.000 | 0.041 | 0.155 | 0.183 | 0.001 | 0.072 | 0.337 | 0.031 | Dimer 2         |
| 28               | 0.028 | 0.089 | 0.001 | 0.019 | 0.156 | 0.151 | 0.001 | 0.005 | 0.029 | 0.235 | Dimer 5         |
| 29               | 0.048 | 0.040 | 0.004 | 0.020 | 0.227 | 0.020 | 0.000 | 0.003 | 0.120 | 0.412 | Dimer 5         |
| 30               | 0.099 | 0.008 | 0.000 | 0.041 | 0.153 | 0.184 | 0.001 | 0.071 | 0.335 | 0.026 | Dimer 5         |
| 31               | 0.081 | 0.329 | 0.007 | 0.229 | 0.022 | 0.079 | 0.000 | 0.010 | 0.170 | 1.810 | Dimer 5         |
| 32               | 0.094 | 0.094 | 0.000 | 0.362 | 0.363 | 0.021 | 0.007 | 0.512 | 1.400 | 1.400 | Dimer 1         |
| 33               | 0.081 | 0.329 | 0.007 | 0.229 | 0.022 | 0.079 | 0.000 | 0.011 | 0.212 | 1.800 | Dimer 2         |
| 34               | 0.525 | 0.000 | 0.000 | 0.419 | 0.029 | 0.004 | 0.001 | 0.000 | 2.540 | 0.022 | Dimer 3         |
| 35               | 0.525 | 0.000 | 0.000 | 0.418 | 0.029 | 0.004 | 0.001 | 0.001 | 2.550 | 0.012 | Dimer 4         |
| 36               | 0.340 | 0.339 | 0.000 | 0.221 | 0.222 | 0.000 | 0.030 | 0.741 | 1.190 | 1.180 | Dimer 1         |
| 37               | 0.318 | 0.123 | 0.004 | 0.241 | 0.063 | 0.011 | 0.000 | 0.020 | 2.160 | 0.351 | Dimer 2         |
| 38               | 0.000 | 0.510 | 0.003 | 0.000 | 0.001 | 0.025 | 0.000 | 0.007 | 0.029 | 2.550 | Dimer 3         |
| 39               | 0.000 | 0.510 | 0.003 | 0.000 | 0.001 | 0.025 | 0.000 | 0.011 | 0.009 | 2.570 | Dimer 4         |
| 40               | 0.081 | 0.329 | 0.007 | 0.229 | 0.022 | 0.079 | 0.000 | 0.010 | 0.170 | 1.810 | Dimer 5         |

**Table S8.** Spin-orbit matrix elements ( $|\langle \Psi_m^1 | \overline{H_{SO}} | \Psi_i^3 \rangle|^2$  ( $\text{cm}^{-2}$ )) for dimer 1–5 of  $\text{Ge}(\text{C}_6\text{H}_5)_4$ .

The relationship between triplet energy and  $i$  is shown in Table S3. Red values are

$$|\langle \Psi_m^1 | \overline{H_{SO}} | \Psi_n^3 \rangle|^2 > 5.1 \text{ cm}^{-2}.$$

| $i \backslash m$ | 1     | 2     | 3     | 4     | 5     | 6     | 7     | 8     | 9      | 10     | Number of dimer |
|------------------|-------|-------|-------|-------|-------|-------|-------|-------|--------|--------|-----------------|
| 1                | 0.261 | 0.261 | 0.000 | 0.226 | 0.226 | 0.079 | 0.168 | 4.710 | 0.645  | 0.646  | Dimer 5         |
| 2                | 0.464 | 0.037 | 0.000 | 0.205 | 0.013 | 0.030 | 0.030 | 0.077 | 5.390  | 1.800  | Dimer 1         |
| 3                | 0.464 | 0.038 | 0.000 | 0.205 | 0.013 | 0.030 | 0.030 | 0.076 | 5.370  | 1.860  | Dimer 2         |
| 4                | 0.014 | 0.271 | 0.016 | 0.091 | 0.000 | 0.009 | 0.012 | 0.768 | 2.450  | 2.650  | Dimer 1         |
| 5                | 0.014 | 0.271 | 0.016 | 0.091 | 0.000 | 0.009 | 0.012 | 0.769 | 2.460  | 2.650  | Dimer 2         |
| 6                | 0.288 | 0.001 | 0.000 | 0.254 | 0.001 | 0.001 | 0.009 | 0.002 | 5.850  | 0.017  | Dimer 3         |
| 7                | 0.353 | 0.001 | 0.000 | 0.223 | 0.001 | 0.000 | 0.009 | 0.003 | 8.420  | 0.122  | Dimer 4         |
| 8                | 0.000 | 0.291 | 0.006 | 0.001 | 0.000 | 0.000 | 0.000 | 0.946 | 0.025  | 5.970  | Dimer 3         |
| 9                | 0.104 | 0.233 | 0.004 | 0.049 | 0.000 | 0.000 | 0.000 | 0.946 | 2.890  | 5.850  | Dimer 4         |
| 10               | 0.167 | 0.167 | 0.027 | 0.155 | 0.156 | 0.000 | 0.097 | 2.500 | 2.340  | 2.350  | Dimer 5         |
| 11               | 0.363 | 0.052 | 0.039 | 0.117 | 0.037 | 0.224 | 0.005 | 0.074 | 0.903  | 0.829  | Dimer 1         |
| 12               | 0.363 | 0.052 | 0.039 | 0.117 | 0.037 | 0.224 | 0.006 | 0.074 | 0.867  | 0.879  | Dimer 2         |
| 13               | 0.474 | 0.000 | 0.087 | 0.008 | 0.090 | 0.078 | 0.006 | 0.015 | 0.502  | 0.028  | Dimer 5         |
| 14               | 0.000 | 0.475 | 0.086 | 0.090 | 0.008 | 0.080 | 0.000 | 0.271 | 0.029  | 0.502  | Dimer 5         |
| 15               | 0.133 | 0.398 | 0.001 | 0.041 | 0.088 | 0.172 | 0.001 | 0.042 | 0.170  | 1.370  | Dimer 1         |
| 16               | 0.133 | 0.398 | 0.001 | 0.041 | 0.088 | 0.172 | 0.001 | 0.042 | 0.160  | 1.330  | Dimer 2         |
| 17               | 0.017 | 0.057 | 0.003 | 0.001 | 0.002 | 0.226 | 0.000 | 0.081 | 0.115  | 1.050  | Dimer 3         |
| 18               | 0.114 | 0.057 | 0.003 | 0.049 | 0.002 | 0.138 | 0.000 | 0.043 | 2.860  | 1.050  | Dimer 4         |
| 19               | 0.184 | 0.204 | 0.001 | 0.006 | 0.192 | 0.008 | 0.000 | 0.032 | 0.429  | 0.656  | Dimer 1         |
| 20               | 0.184 | 0.204 | 0.001 | 0.006 | 0.192 | 0.008 | 0.000 | 0.032 | 0.443  | 0.627  | Dimer 2         |
| 21               | 0.034 | 0.003 | 0.000 | 0.529 | 0.228 | 0.000 | 0.001 | 0.002 | 0.959  | 0.028  | Dimer 3         |
| 22               | 0.139 | 0.002 | 0.000 | 0.577 | 0.146 | 0.000 | 0.001 | 0.003 | 3.730  | 0.046  | Dimer 4         |
| 23               | 0.025 | 0.487 | 0.003 | 0.003 | 0.011 | 0.244 | 0.000 | 0.104 | 0.132  | 0.007  | Dimer 3         |
| 24               | 0.234 | 0.389 | 0.001 | 0.060 | 0.045 | 0.175 | 0.000 | 0.071 | 2.890  | 0.022  | Dimer 4         |
| 25               | 0.523 | 0.023 | 0.000 | 0.053 | 0.233 | 0.012 | 0.001 | 0.006 | 0.050  | 0.113  | Dimer 3         |
| 26               | 0.523 | 0.121 | 0.000 | 0.091 | 0.161 | 0.048 | 0.001 | 0.023 | 2.850  | 0.115  | Dimer 4         |
| 27               | 0.014 | 0.032 | 0.004 | 0.425 | 0.123 | 0.060 | 0.001 | 0.098 | 0.507  | 0.130  | Dimer 1         |
| 28               | 0.014 | 0.032 | 0.004 | 0.425 | 0.123 | 0.060 | 0.001 | 0.098 | 0.504  | 0.124  | Dimer 2         |
| 29               | 0.000 | 0.104 | 0.000 | 0.459 | 0.016 | 0.115 | 0.000 | 0.527 | 0.009  | 1.560  | Dimer 5         |
| 30               | 0.104 | 0.000 | 0.000 | 0.016 | 0.460 | 0.116 | 0.004 | 0.000 | 0.044  | 0.132  | Dimer 5         |
| 31               | 0.353 | 0.353 | 0.000 | 0.611 | 0.611 | 0.439 | 0.040 | 3.930 | 8.940  | 8.950  | Dimer 5         |
| 32               | 0.670 | 0.311 | 0.044 | 0.509 | 0.090 | 0.508 | 0.000 | 0.015 | 6.040  | 6.440  | Dimer 1         |
| 33               | 0.670 | 0.311 | 0.044 | 0.509 | 0.090 | 0.508 | 0.000 | 0.015 | 5.880  | 6.630  | Dimer 2         |
| 34               | 1.250 | 0.001 | 0.000 | 0.962 | 0.461 | 0.018 | 0.000 | 0.008 | 15.200 | 0.043  | Dimer 3         |
| 35               | 0.800 | 0.002 | 0.000 | 0.941 | 0.461 | 0.017 | 0.000 | 0.016 | 10.300 | 0.157  | Dimer 4         |
| 36               | 0.001 | 1.210 | 0.109 | 0.000 | 0.007 | 0.494 | 0.000 | 0.001 | 0.062  | 15.400 | Dimer 3         |
| 37               | 0.105 | 0.716 | 0.091 | 0.048 | 0.008 | 0.494 | 0.001 | 0.001 | 2.930  | 7.780  | Dimer 4         |
| 38               | 0.180 | 0.943 | 0.039 | 0.620 | 0.392 | 0.083 | 0.000 | 0.005 | 6.380  | 7.740  | Dimer 1         |
| 39               | 0.180 | 0.943 | 0.039 | 0.620 | 0.392 | 0.083 | 0.000 | 0.005 | 6.530  | 7.510  | Dimer 2         |
| 40               | 0.353 | 0.353 | 0.000 | 0.611 | 0.611 | 0.439 | 0.040 | 3.930 | 8.940  | 8.950  | Dimer 5         |

**Table S9.** Relationships between  $\mu_{S_m \rightarrow S_0}^2$  ( $D^2$ ) and  $m$  of dimer 1–5 in  $C(C_6H_5)_4$ ,  $Si(C_6H_5)_4$ , and  $Ge(C_6H_5)_4$ .

| $C(C_6H_5)_4$ | <i>Type</i> \ <i>m</i> | 1     | 2     | 3     | 4     | 5     | 6     | 7     | 8     | 9     | 10    |
|---------------|------------------------|-------|-------|-------|-------|-------|-------|-------|-------|-------|-------|
|               | Dimer 1                | 0.423 | 0.423 | 1.370 | 0.443 | 0.145 | 0.000 | 0.032 | 0.032 | 0.045 | 4.060 |
| Dimer 2       | 0.831                  | 0.257 | 0.222 | 0.518 | 0.439 | 0.389 | 2.070 | 0.389 | 0.585 | 0.044 |       |
| Dimer 3       | 0.927                  | 0.000 | 0.973 | 0.000 | 0.005 | 2.450 | 1.020 | 0.002 | 0.820 | 0.002 |       |
| Dimer 4       | 0.927                  | 0.000 | 0.973 | 0.000 | 0.007 | 2.460 | 1.000 | 0.001 | 0.848 | 0.002 |       |
| Dimer 5       | 0.492                  | 0.488 | 0.304 | 0.000 | 1.660 | 1.660 | 0.001 | 0.035 | 0.741 | 0.746 |       |

| $Si(C_6H_5)_4$ | <i>Type</i> \ <i>m</i> | 1     | 2     | 3     | 4     | 5     | 6     | 7     | 8     | 9     | 10    |
|----------------|------------------------|-------|-------|-------|-------|-------|-------|-------|-------|-------|-------|
|                | Dimer 1                | 0.179 | 1.070 | 0.412 | 0.651 | 0.065 | 0.540 | 0.005 | 0.003 | 0.853 | 2.770 |
| Dimer 2        | 0.179                  | 1.070 | 0.412 | 0.651 | 0.065 | 0.549 | 0.005 | 0.005 | 0.741 | 2.870 |       |
| Dimer 3        | 0.000                  | 0.962 | 1.080 | 0.003 | 0.005 | 0.522 | 0.000 | 0.009 | 0.035 | 3.710 |       |
| Dimer 4        | 0.000                  | 0.962 | 1.080 | 0.003 | 0.005 | 0.522 | 0.001 | 0.011 | 0.012 | 3.980 |       |
| Dimer 5        | 0.216                  | 0.219 | 0.000 | 0.509 | 0.509 | 0.288 | 0.505 | 0.505 | 1.350 | 1.350 |       |

| $Ge(C_6H_5)_4$ | <i>Type</i> \ <i>m</i> | 1     | 2     | 3     | 4     | 5     | 6     | 7     | 8     | 9     | 10    |
|----------------|------------------------|-------|-------|-------|-------|-------|-------|-------|-------|-------|-------|
|                | Dimer 1                | 0.092 | 0.480 | 0.230 | 0.435 | 0.003 | 0.423 | 0.002 | 0.003 | 2.070 | 3.510 |
| Dimer 2        | 0.092                  | 0.480 | 0.230 | 0.435 | 0.003 | 0.423 | 0.002 | 0.003 | 2.160 | 3.420 |       |
| Dimer 3        | 0.000                  | 0.505 | 0.531 | 0.001 | 0.001 | 0.371 | 0.009 | 0.001 | 0.017 | 4.110 |       |
| Dimer 4        | 0.000                  | 0.505 | 0.531 | 0.001 | 0.000 | 0.371 | 0.012 | 0.000 | 0.082 | 4.040 |       |
| Dimer 5        | 0.123                  | 0.123 | 0.000 | 0.245 | 0.245 | 0.285 | 0.700 | 0.705 | 1.880 | 1.880 |       |

**Table S10.** Summary of  $S_m$ - $S_0$  energies and  $\Delta E_{T_1-S_m}$  of dimer 2 of  $C(C_6H_5)_4$ ,  $Si(C_6H_5)_4$ , and  $Ge(C_6H_5)_4$ .

|                |                           |       |       |       |       |       |       |       |       |       |       |
|----------------|---------------------------|-------|-------|-------|-------|-------|-------|-------|-------|-------|-------|
| $C(C_6H_5)_4$  | $m$                       | 1     | 2     | 3     | 4     | 5     | 6     | 7     | 8     | 9     | 10    |
|                | $S_m$ - $S_0$ energy (eV) | 5.031 | 5.034 | 5.050 | 5.050 | 5.230 | 5.270 | 5.270 | 5.300 | 5.320 | 5.330 |
|                | $T_1$ - $S_0$ energy (eV) | 3.960 |       |       |       |       |       |       |       |       |       |
|                | $\Delta E_{T_1-S_m}$ (eV) | 1.071 | 1.075 | 1.086 | 1.089 | 1.269 | 1.307 | 1.314 | 1.342 | 1.360 | 1.372 |
| $Si(C_6H_5)_4$ | $m$                       | 1     | 2     | 3     | 4     | 5     | 6     | 7     | 8     | 9     | 10    |
|                | $S_m$ - $S_0$ energy (eV) | 5.266 | 5.278 | 5.280 | 5.290 | 5.300 | 5.310 | 5.370 | 5.380 | 5.420 | 5.430 |
|                | $T_1$ - $S_0$ energy (eV) | 4.035 |       |       |       |       |       |       |       |       |       |
|                | $\Delta E_{T_1-S_m}$ (eV) | 1.230 | 1.243 | 1.247 | 1.251 | 1.268 | 1.271 | 1.336 | 1.343 | 1.389 | 1.393 |
| $Ge(C_6H_5)_4$ | $m$                       | 1     | 2     | 3     | 4     | 5     | 6     | 7     | 8     | 9     | 10    |
|                | $S_m$ - $S_0$ energy (eV) | 5.327 | 5.338 | 5.340 | 5.340 | 5.370 | 5.370 | 5.400 | 5.410 | 5.510 | 5.520 |
|                | $T_1$ - $S_0$ energy (eV) | 4.047 |       |       |       |       |       |       |       |       |       |
|                | $\Delta E_{T_1-S_m}$ (eV) | 1.281 | 1.292 | 1.292 | 1.297 | 1.322 | 1.325 | 1.357 | 1.363 | 1.465 | 1.477 |

## 5. Figure S1–S11

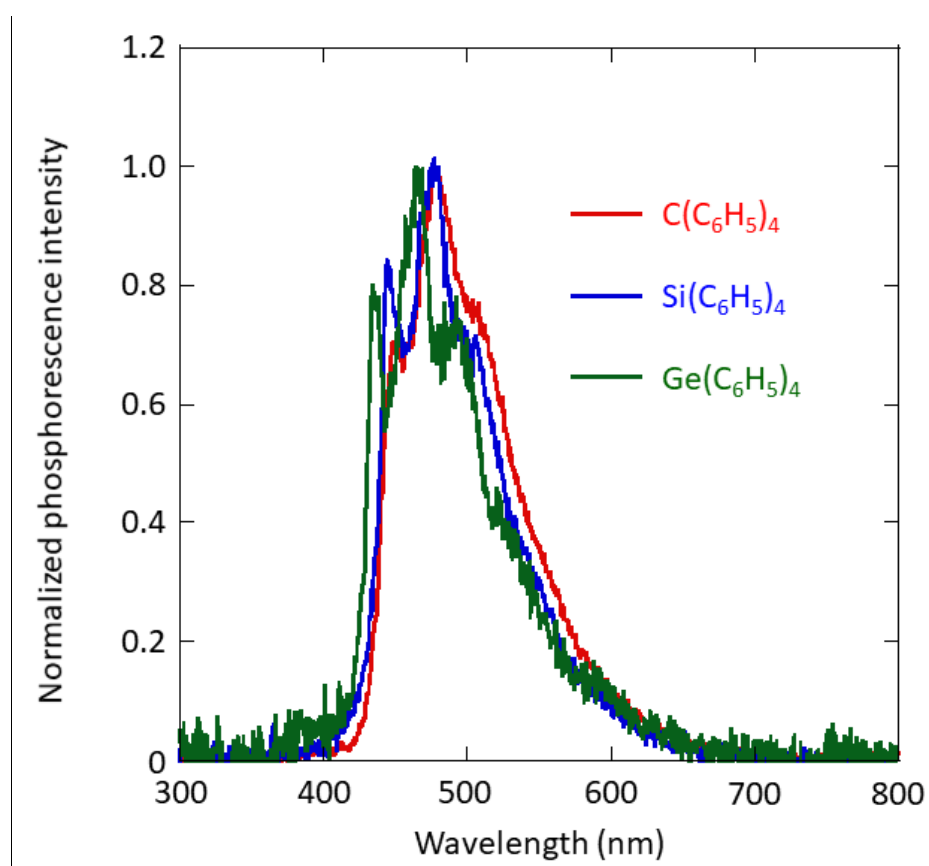

**Figure S1.** Phosphorescence spectra of  $C(C_6H_5)_4$ ,  $Si(C_6H_5)_4$ , and  $Ge(C_6H_5)_4$  in 2-methyltetrahydrofuran at 77 K. Spectra were measured soon after ceasing excitation at 280 nm.

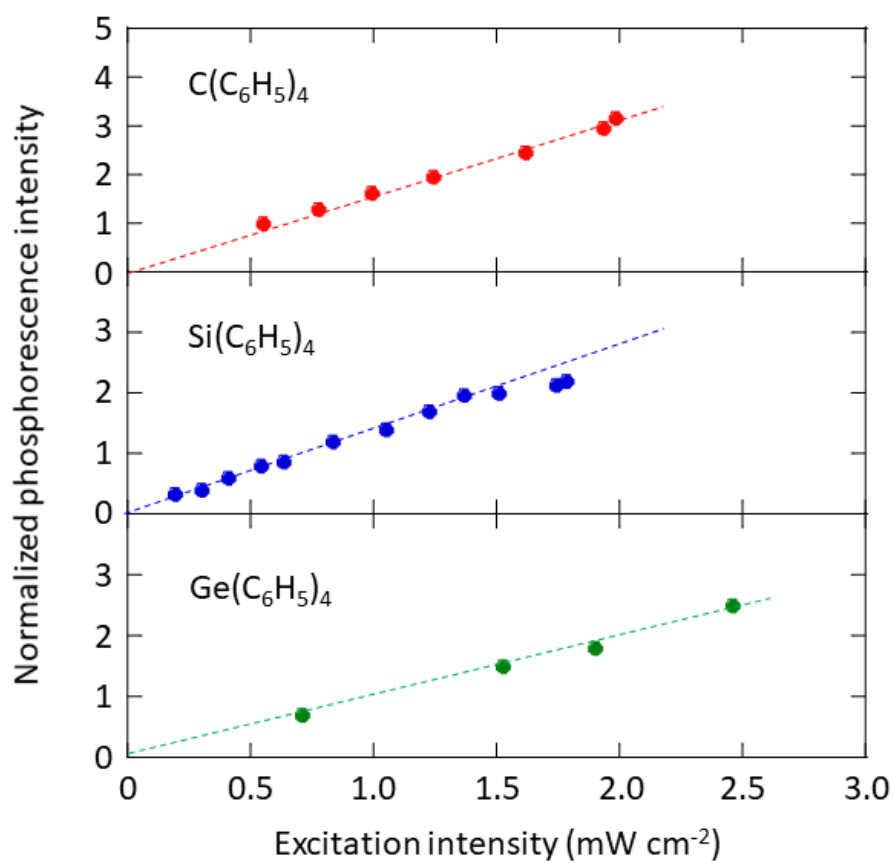

**Figure S2.** Dependence of RTP intensity change of C(C<sub>6</sub>H<sub>5</sub>)<sub>4</sub>, Si(C<sub>6</sub>H<sub>5</sub>)<sub>4</sub>, and Ge(C<sub>6</sub>H<sub>5</sub>)<sub>4</sub> crystals on excitation intensity at 280 nm.



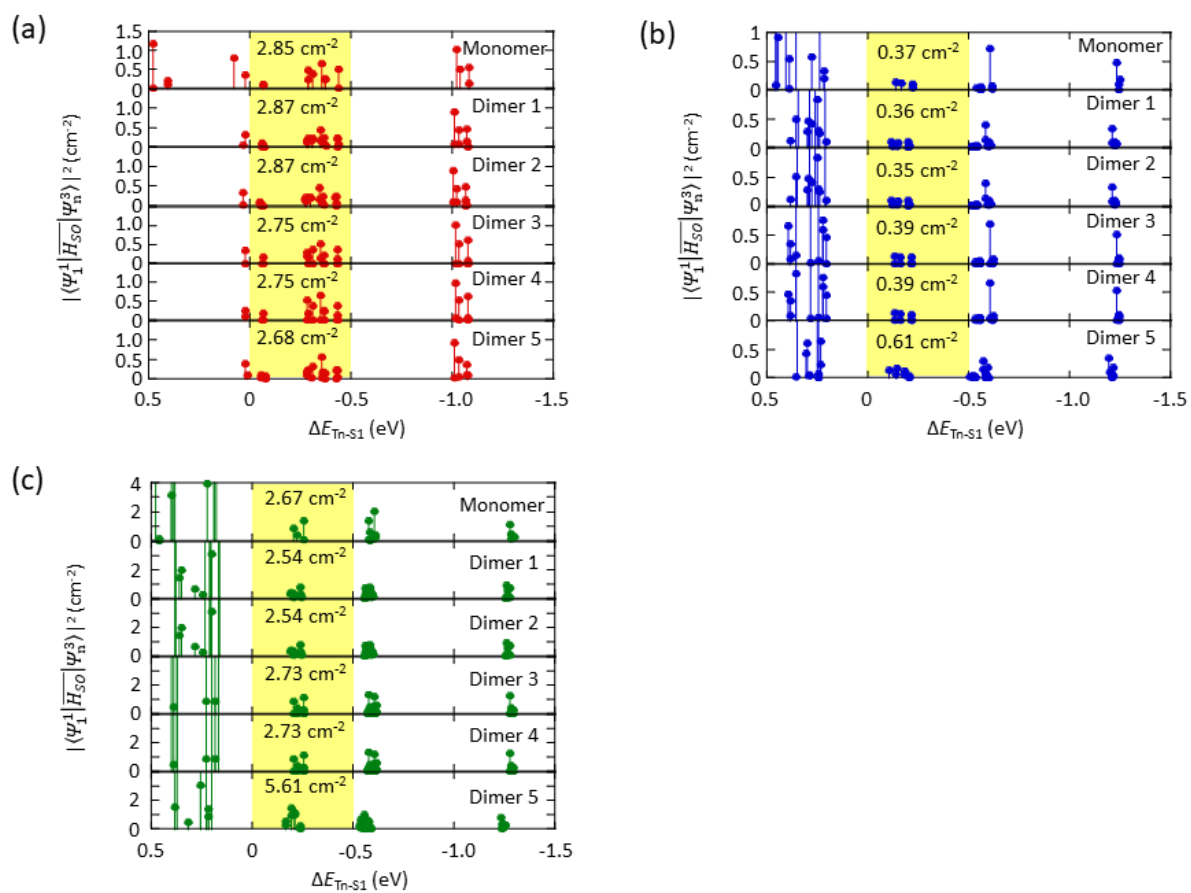

**Figure S3.** Relationships between  $|\langle \psi_1^1 | \overline{H}_{SO} | \psi_n^3 \rangle|^2$  and  $\Delta E_{Tn-S1}$  of monomers and dimer 1–5 of (a) C(C<sub>6</sub>H<sub>5</sub>)<sub>4</sub>, (b) Si(C<sub>6</sub>H<sub>5</sub>)<sub>4</sub>, and (c) Ge(C<sub>6</sub>H<sub>5</sub>)<sub>4</sub>.

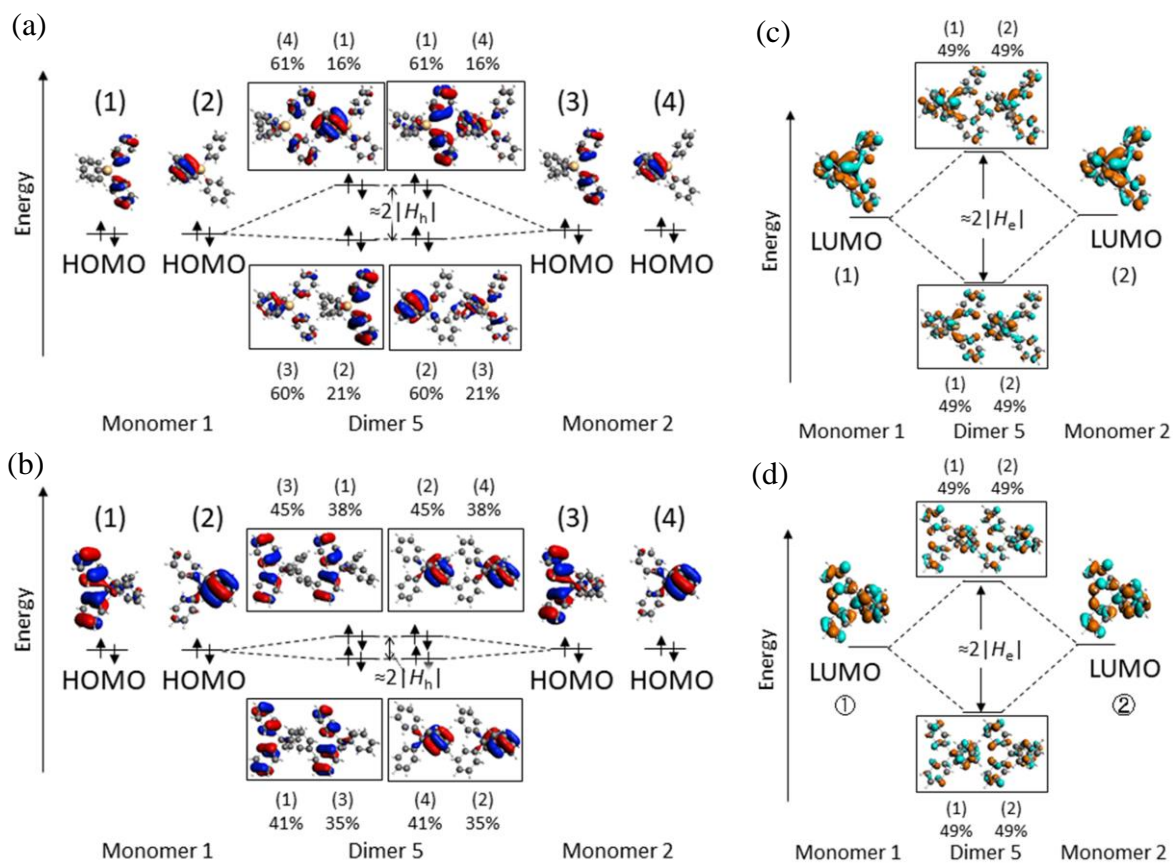

**Figure S4.** Structures of MOs causing small  $|H_h|$  and large  $|H_e|$  of  $\text{Si}(\text{C}_6\text{H}_5)_4$  and  $\text{C}(\text{C}_6\text{H}_5)_4$  crystals. (a) Electronic structures causing small  $|H_h|$  of dimer 5 of  $\text{Si}(\text{C}_6\text{H}_5)_4$ . (b) Electronic structures causing small  $|H_h|$  of dimer 5 of  $\text{C}(\text{C}_6\text{H}_5)_4$ . (c) Electronic structures causing large  $|H_e|$  of dimer 5 of  $\text{Si}(\text{C}_6\text{H}_5)_4$ . (d) Electronic structures causing large  $|H_e|$  of dimer 5 of  $\text{C}(\text{C}_6\text{H}_5)_4$ .

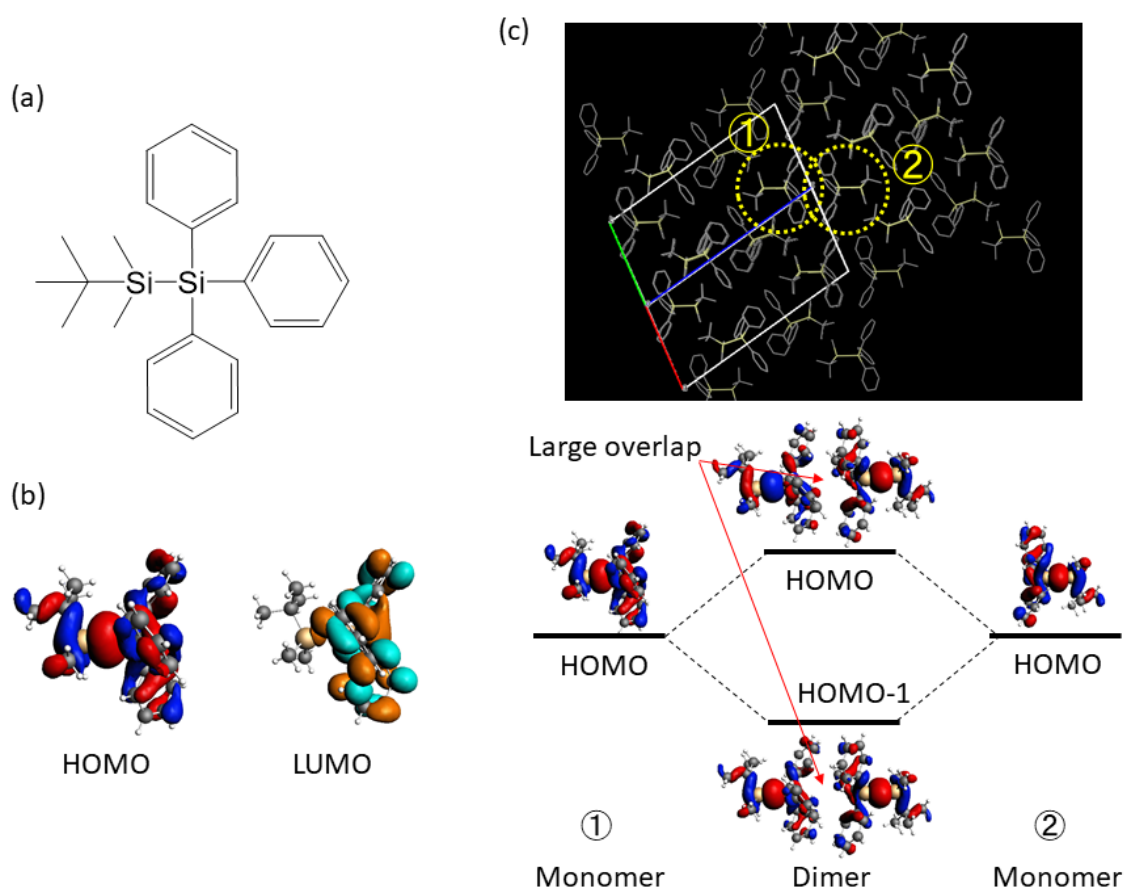

**Figure S5.** Molecular, electronic, and crystalline structures of (*tert*-butyldimethylsilyl)triphenylsilane. (a) Chemical structure. (b) HOMO and LUMO of a monomer. (c) Crystalline structure and molecular orbitals related to the hole transfer integral of a dimer in the crystal.

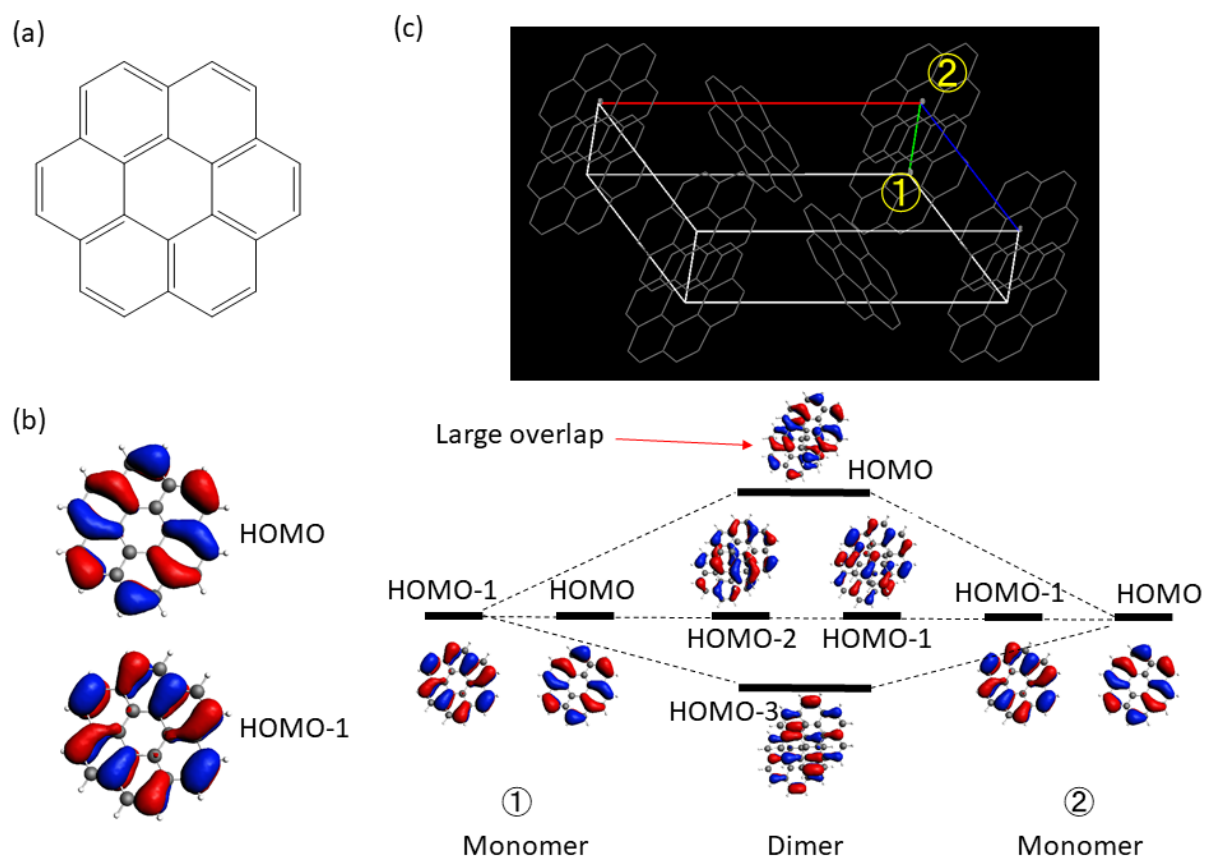

**Figure S6.** Molecular, electronic, and crystalline structures of coronene. (a) Chemical structure. (b) HOMO and LUMO of a monomer. (c) Crystalline structure and molecular orbitals related to hole transfer integral of a dimer in the crystal.

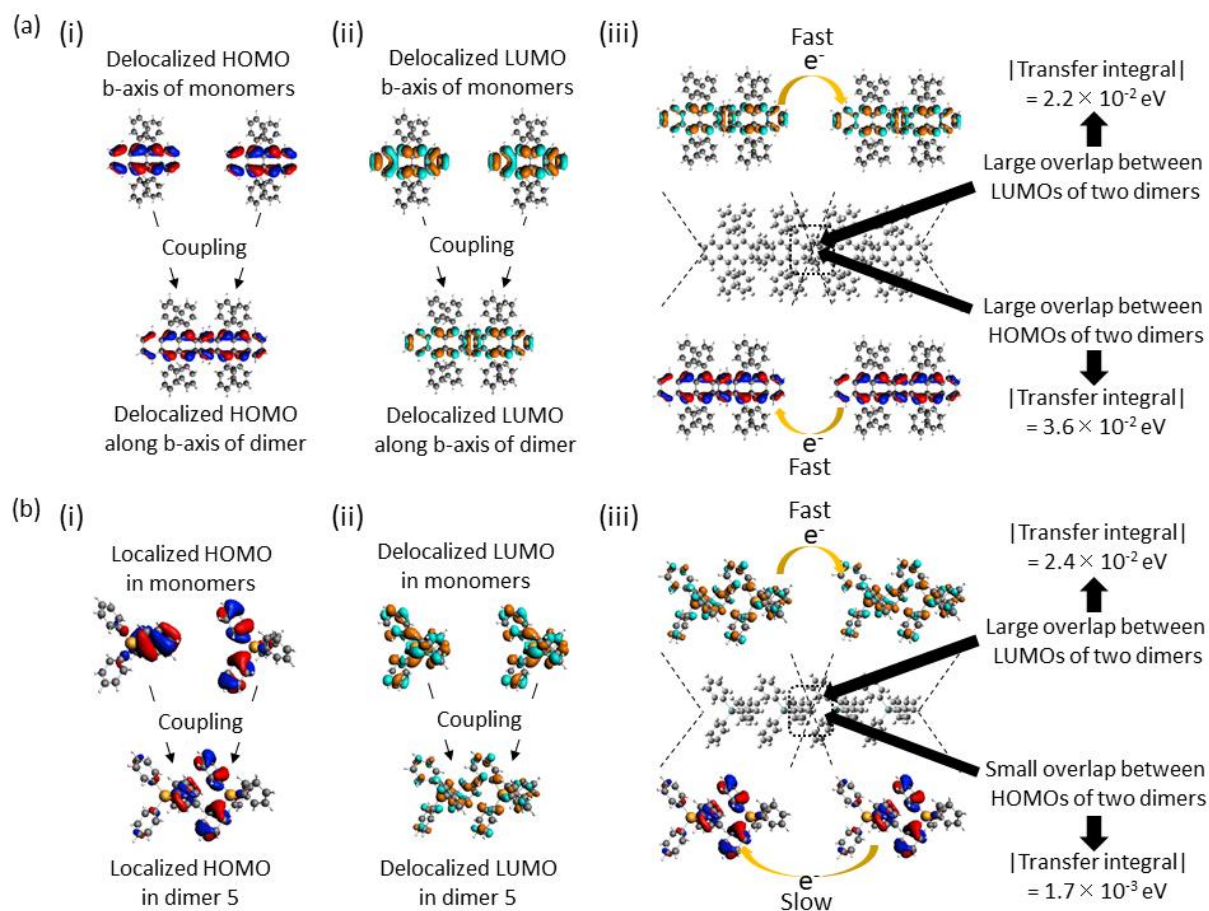

**Figure S7.** Dependence of the HOMOs and LUMOs of rubrene and  $\text{Ge}(\text{C}_6\text{H}_5)_4$  on molecular stacking. (a) (i) Change of HOMO caused by dimerization of two rubrene monomers along the *b*-axis of a rubrene crystal. (ii) Change of LUMO caused by dimerization of two rubrene monomers along the *b*-axis of a rubrene crystal. (iii) Overlap of the HOMOs and LUMOs of each rubrene dimer in a tetramer along the *b*-axis of a rubrene crystal and hole and electron transfer integrals between the two dimers in the tetramer. (b) (i) Change of HOMO caused by dimerization of two  $\text{Ge}(\text{C}_6\text{H}_5)_4$  monomers along the *c*-axis of a  $\text{Ge}(\text{C}_6\text{H}_5)_4$  crystal. (ii) Change of LUMO caused by dimerization of two  $\text{Ge}(\text{C}_6\text{H}_5)_4$  monomers along the *c*-axis of a  $\text{Ge}(\text{C}_6\text{H}_5)_4$  crystal. (iii) Overlap of HOMOs and LUMOs of each  $\text{Ge}(\text{C}_6\text{H}_5)_4$  dimer in a tetramer along the *c*-axis of a  $\text{Ge}(\text{C}_6\text{H}_5)_4$  crystal and hole and electron transfer integrals between the two dimers in the tetramer.

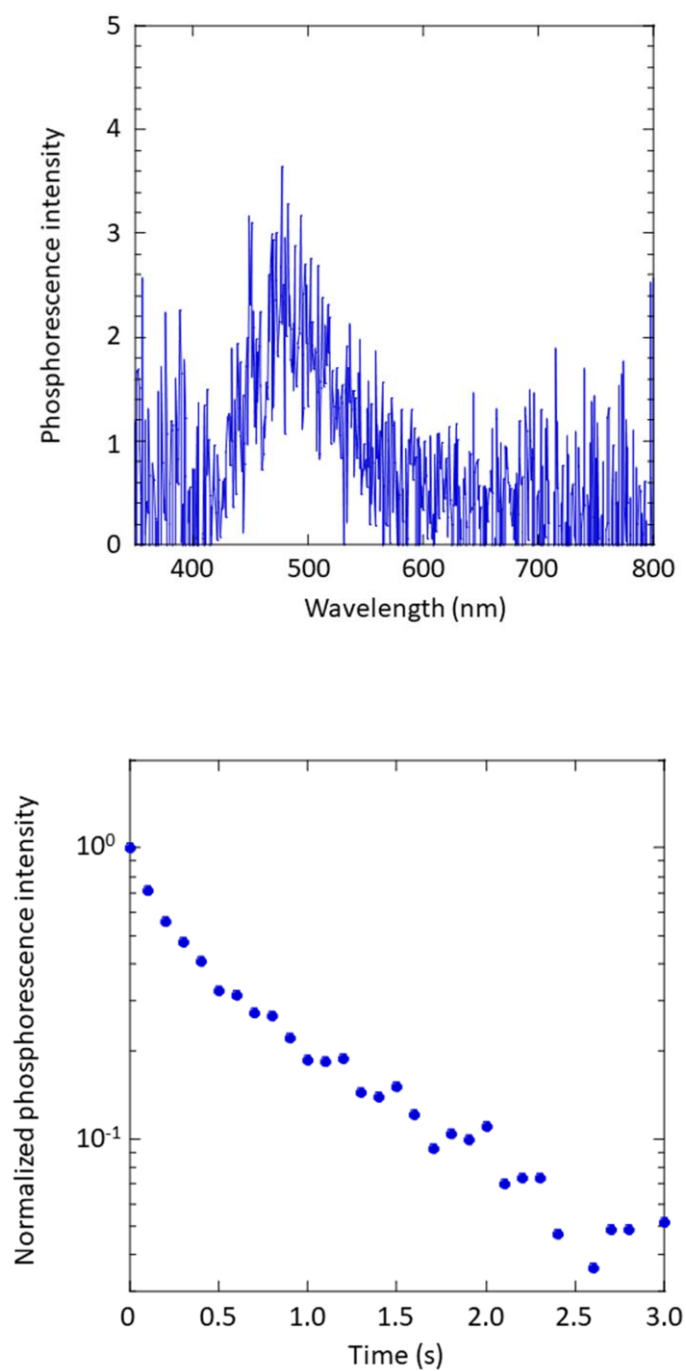

**Figure S8.** (a) RTP spectrum and (b) decay characteristics of a 1 wt% Si(C<sub>6</sub>H<sub>5</sub>)<sub>4</sub>-doped Zeonex film under vacuum conditions. Excitation wavelength is 280 nm.

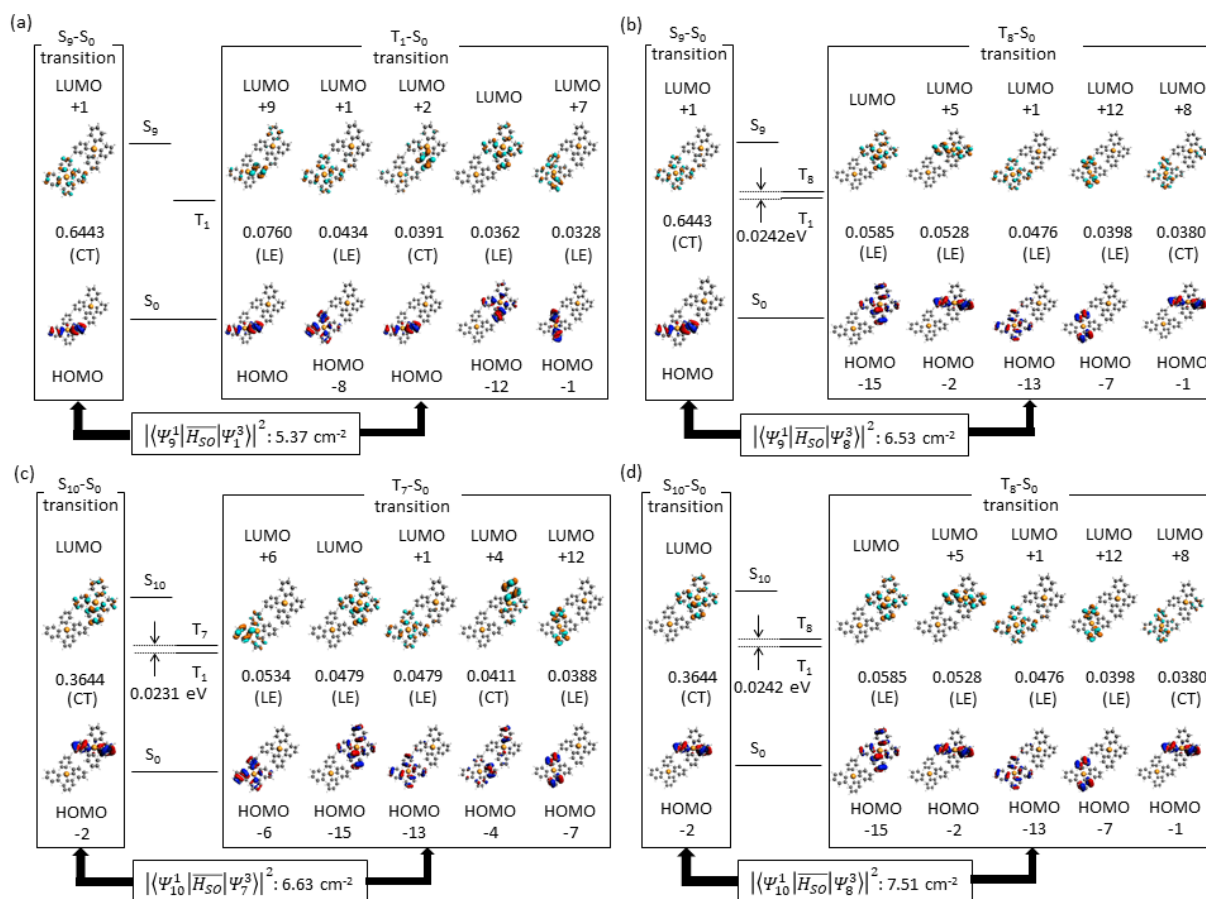

**Figure S9.** MOs related to the  $S_m-S_0$  and  $T_n-S_0$  transitions contributing to the large  $|\langle \Psi_m^1 | \overline{H_{SO}} | \Psi_n^3 \rangle|^2$  of dimer 2 of  $\text{Ge}(\text{C}_6\text{H}_5)_4$ . (a) MOs related to the  $S_9-S_0$  and  $T_1-S_0$  transitions and value of  $|\langle \Psi_9^1 | \overline{H_{SO}} | \Psi_1^3 \rangle|^2$ . (b) MOs related to the  $S_9-S_0$  and  $T_8-S_0$  transitions and value of  $|\langle \Psi_9^1 | \overline{H_{SO}} | \Psi_8^3 \rangle|^2$ . (c) MOs related to the  $S_{10}-S_0$  and  $T_7-S_0$  transitions and value of  $|\langle \Psi_{10}^1 | \overline{H_{SO}} | \Psi_7^3 \rangle|^2$ . (d) MOs related to the  $S_{10}-S_0$  and  $T_8-S_0$  transitions and value of  $|\langle \Psi_{10}^1 | \overline{H_{SO}} | \Psi_8^3 \rangle|^2$ .



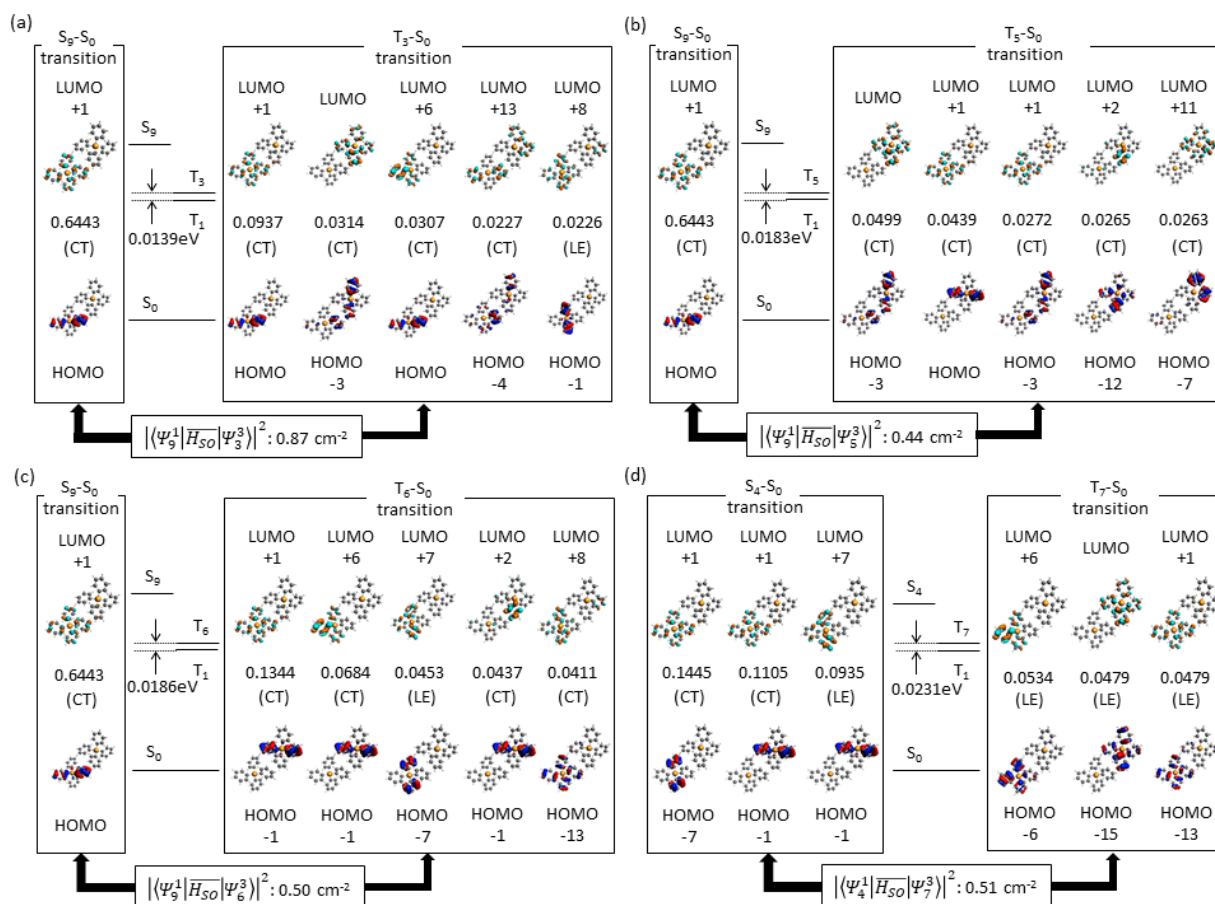

**Figure S10.** MOs related to the  $S_m-S_0$  and  $T_n-S_0$  transitions contributing to small  $|\langle \Psi_m^1 | \overline{H_{SO}} | \Psi_n^3 \rangle|^2$ . (a) MOs related to the  $S_9-S_0$  and  $T_3-S_0$  transitions and value of  $|\langle \Psi_9^1 | \overline{H_{SO}} | \Psi_3^3 \rangle|^2$  for dimer 2 of  $\text{Ge}(\text{C}_6\text{H}_5)_4$ . (b) MOs related to the  $S_9-S_0$  and  $T_5-S_0$  transitions and value of  $|\langle \Psi_9^1 | \overline{H_{SO}} | \Psi_5^3 \rangle|^2$  for dimer 2 of  $\text{Ge}(\text{C}_6\text{H}_5)_4$ . (c) MOs related to the  $S_9-S_0$  and  $T_6-S_0$  transitions and value of  $|\langle \Psi_9^1 | \overline{H_{SO}} | \Psi_6^3 \rangle|^2$  for dimer 2 of  $\text{Ge}(\text{C}_6\text{H}_5)_4$ . (d) MOs related to the  $S_4-S_0$  and  $T_7-S_0$  transitions and value of  $|\langle \Psi_4^1 | \overline{H_{SO}} | \Psi_7^3 \rangle|^2$  for dimer 2 of  $\text{Si}(\text{C}_6\text{H}_5)_4$ .



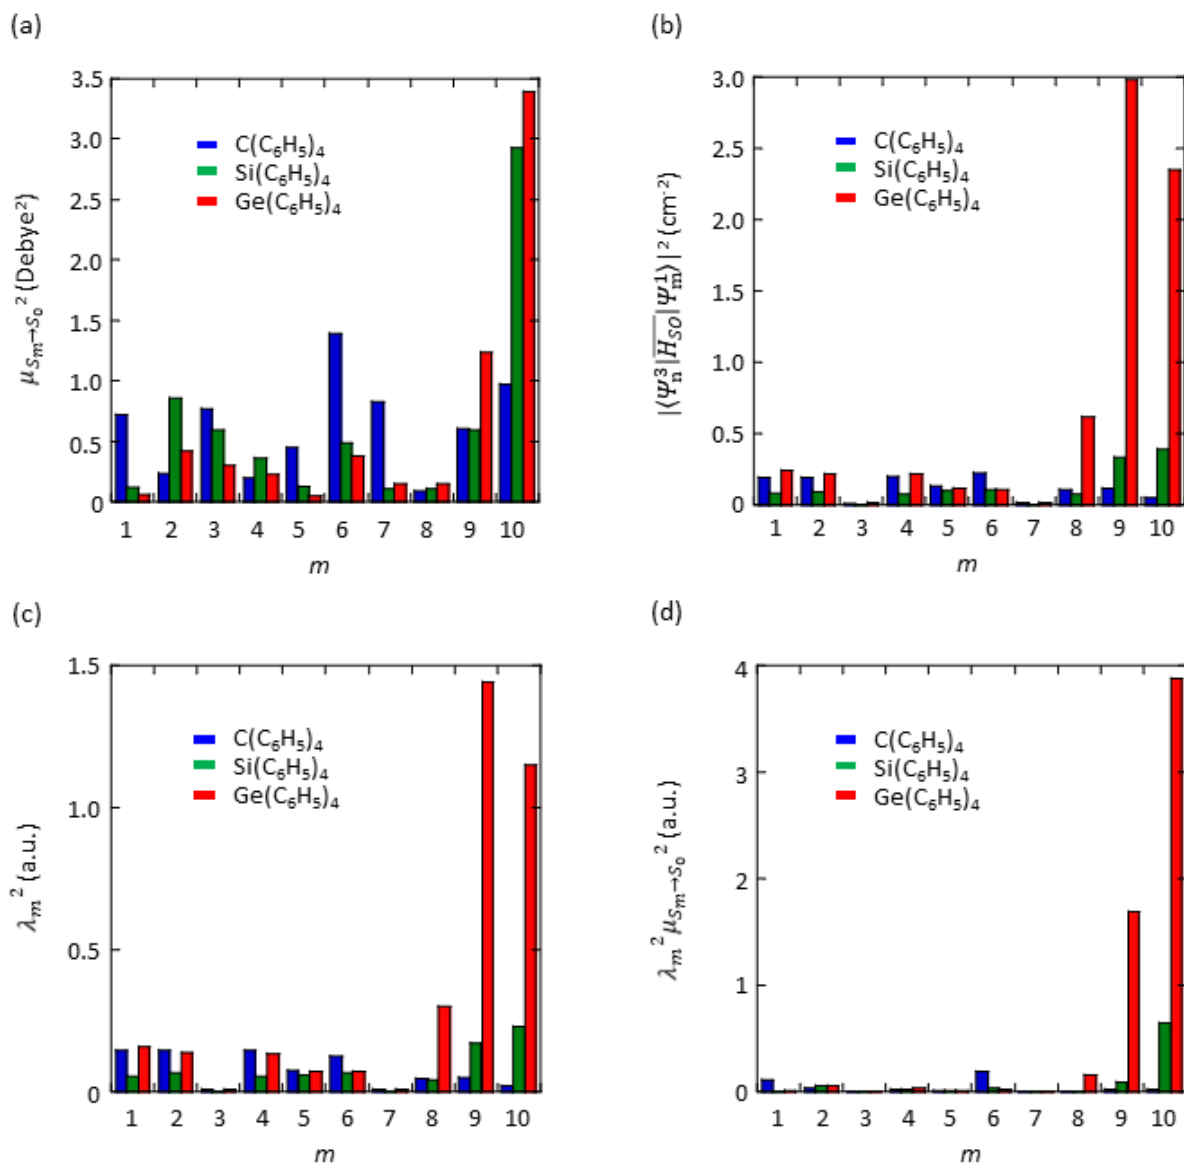

**Figure S11.** Relationships between photophysical parameters related to  $k_p$  and  $m$  for  $C(C_6H_5)_4$ ,  $Si(C_6H_5)_4$ , and  $Ge(C_6H_5)_4$  crystals. (a) Relationship between  $m$  and  $\mu_{S_m \rightarrow S_0}^2$  averaged for  $i=1-40$  of dimer 1–5. (b) Relationship between  $m$  and  $|\langle \psi_n^1 | \overline{H_{SO}} | \psi_i^3 \rangle|^2$  averaged for  $i=1-40$  of dimer 1–5. (c) Relationship between  $m$  and  $\lambda_m^2$  averaged for  $i=1-40$  of dimer 1–5. (d) Relationship between  $m$  and  $\mu_{S_m \rightarrow S_0}^2 \lambda_m^2$  averaged for  $i=1-40$  of dimer 1–5.

**6. Supporting reference**

(S1) K. Schmidt, S. Brovelli, V. Coropceanu, D. Baljonne, J. Cornil, C. Bazzini, T. Caronna, R. Tubino, F. Meinardi, Z. Shuai, J-L. Bredas, *J. Phys. Chem. A* **2007**, *111*, 10490.
